# Supplementary material for: Insights into the Life Cycle of Yeasts from the CTG Clade Revealed by the Analysis of the Millerozyma (Pichia) farinosa Species Complex
Source: PLoS One. 2012 May 4;7(5):e35842. doi: 10.1371/journal.pone.0035842 (PMC3344839; doi:10.1371/journal.pone.0035842)
Supplement: Table S2 — Accession numbers. (XLSX) [file pone.0035842.s006.xlsx]

## Sheet: Feuil1
Table S2: accession numbers
	Sequences
Strains	ACT1 intron	RPL33 intron	ACT1	COX2	COX3	AB-l	AB-r	CD-l	CD-r	EF-l	EF-r	GH-l	GH-r	IJ-l	IJ-r	KL-l	KL-r	MN-l	MN-r	EI	FJ	CD1	CD2	CD3	CD4	CD5bis int	CD7	GH-l2	GH-r2	KL-l2	KL-r2	MN-r2
CBS 185T	FN556091	FN556141	FN552711	FN555421	HE575439	FN994813	FN994817	FN994824	n.a	FN994832	FN994828	FN994845	FN994842	FN994852	FN994848	n.a	FN556141	FN994866	FN994862	FN994835	FN994839	HE577188
CBS 242	FN556088	FN556143	n.a	FR668050	HE575447
CBS 2020	FN556086	FN556142	FR668038	FR668039	HE575450
CBS 2597	FN556087	FN556139	n.a	FR668052	HE575438
CBS 2768	FN556093	FN556144	n.a	FR668043	HE575437
CBS 4841	FN556089	FN556140	n.a	FR668046	HE575445
CBS 11514	FR668070	FN556145	FR668036	FR668042	n.a
NCYC 3111	FN556093	FN556147	n.a	FR668048	HE575448
NBRC 0602	n.a	n.a	n.a	n.a	n.a
PYCC 2633	FR668071	FN556146	FR668037	FR668047	n.a
VTT 86127 (ATCC 20218)	FR668067	FR668074	n.a	FR668051	n.a
CBS 2001	FN556097	FN556130	FN552712	FN552809	HE575449	FN994814	FN994818	FN994825	FN994821	FN994833	FN994829	FN994846	FN994843	FN994853	FN994849	FN994860	FN556130	FN994867	FN994863	FN994836	FN994840	HE577187	HE577197	HE577200	HE577211	HE577213	HE577220	HE577273	HE577280	HE577292	HE577293	HE577304
CBS 2101	FN556095	FN556128	n.a	n.a	HE575435
CBS 4548	FN556108	FN556124	n.a	FR668044	HE575443
CBS 5031	FN556100	FN556129	n.a	FR668040	HE575456
CBS 5116	FN556094	FN556131	n.a	FR668041	HE575446
DSMZ 70362	FN556095	FN556123	n.a	FR668045	HE575440
MUCL 38866	FN556107	FN556125	n.a	n.a	n.a
MUCL 38867	FN556106	FN556120	n.a	n.a	n.a
MUCL 38869	FN556103	FN556118	n.a	n.a	n.a
MUCL 38870	FN556104	FN556119	n.a	n.a	n.a
MUCL 38871	FN556105	FN556122	n.a	FR668049	HE575444
CBS 2007	FN556079	FN556152	FN552714	FN555417	HE575453	FN994816	FN994820	FN994827	FN994823	FN994834	FN994831	FN994847	FN994844	FN994855	FN994851	FN994861	FN556152	n.a	FN994865	FN994838	FN994841	HE577181	HE577198	HE577205	HE577206		HE577226	HE577276	HE577283	HE577288	HE577298	HE577305
NBRC 10896	n.a	n.a	n.a	n.a	n.a
CBS 7064T	FN556084 and FN556101	FN556127	FN552715	HE575433	HE575455
CBS 8045	n.a	FN556137 and FN556148	n.a	FN555416	n.a		HE663457 and HE663458	HE663459 and HE663460							HE663461 and HE663462
CBS 2006	FN556080 and FN556098	FN556134 and FN556156	n.a	FN555418	HE575452		HE577228 and HE577229			HE577256 and HE577257	HE577249			HE577263	HE577267 and HE577268							HE577183 and HE577184	HE577195 and HE577199	HE577201 and HE577202	HE577208 and HE577209	HE577214 and HE577215	HE577222 and HE577223	HE577274 and HE577275	HE577281 and HE577282	HE577291	HE577294 and HE577295	HE577303
CBS 4073	FN556078 and FN556109	FN556133 and FN556150	n.a	FN555423	HE575441
CBS 4710	FN556081 and FN556110	FN556135 and FN556155	n.a	FN555424	HE575442
CBS 5949	FN556102	FN556121 and FN556153	n.a	FN555420	HE575454
CBS 5730	FN556085 and FN556099	FN556132 and FN556151	n.a	FN555422	HE575436
CBS 7911	FN556077 and FN556092	FN556138	FR6968034	FN555419	HE575451
VTT 86125 (ATCC 20210)	FR668068 and FR668069	FR668072 and FR668073	n.a	FR668053	n.a
CBS 2004T	FN556074	FN556114	FN552713	FN555415	HE575458	FN994815	FN994819	FN994826	FN994822	n.a	FN994830	n.a	n.a	FN994854	FN994850	n.a	FN556114	n.a	FN994864	FN994837	n.a	HE577185			HE577212	HE577218	HE577225	HE577279	HE577286	HE577287	HE577299	HE577306
CBS 4709	FN556072	FN556113	n.a	n.a	n.a
CBS 4842	FN556073	FN556117	n.a	n.a	n.a
CBS 5013	FN556075	FN556115	FR668035	n.a	n.a
NBRC 01003	n.a	n.a	n.a	n.a	n.a
CBS 2607	n.a	FN556116	FN555413	HE575434	HE575457
NCYC 386T	FN556112	FN556157	FN552716	FN552808	n.a
NBRC 0465	n.a	n.a	n.a	n.a	n.a
NBRC 0574	n.a	n.a	n.a	n.a	n.a
spore G6 (CLIB 1251)						HE577237 and HE577238	HE577230 and HE577231			HE577252 and HE577254	HE577248			HE577262	HE577270							HE577186	HE577196	HE577203	HE577207	HE577218	HE577221	HE577277	HE577285	HE577289	HE577296 and HE577297	HE577302
spore 28 (CLIB 1250)						HE577239	HE577232 and HE577233			HE577251	HE577247			HE577264								HE577182		HE577204	HE577210	HE577219	HE577224	HE577278	HE577284	HE577290	HE577300	HE577301
